# Supplementary material for: Next-generation insights into regulatory T cells: expression profiling and FoxP3 occupancy in Human
Source: PubMed Central journal article supplement — Nucleic Acids Res. 2011 Jul 4;39(18):7946–60. doi: 10.1093/nar/gkr444 (PMC3185410; doi:10.1093/nar/gkr444), 2011-07-04

**Figure S1: The presence and regulation of the truncated form of IRAK1** was proven indirectly by qRT-PCR using Roche’s UPL technology. Shown is the confirmation of an activation-induced up-regulation of IRAK1, measured by a “generic” IRAK1 probe (detection of all transcript variants). IRAK1 full length transcript is not regulated (full length probe). We conclude that this result originates from the up-regulation of the truncated form. Unfortunately, the sequence analysis of the truncated isoform did not allow an applicable primer and probe design. Used primer sequences and associated UPL probe are shown at the bottom.

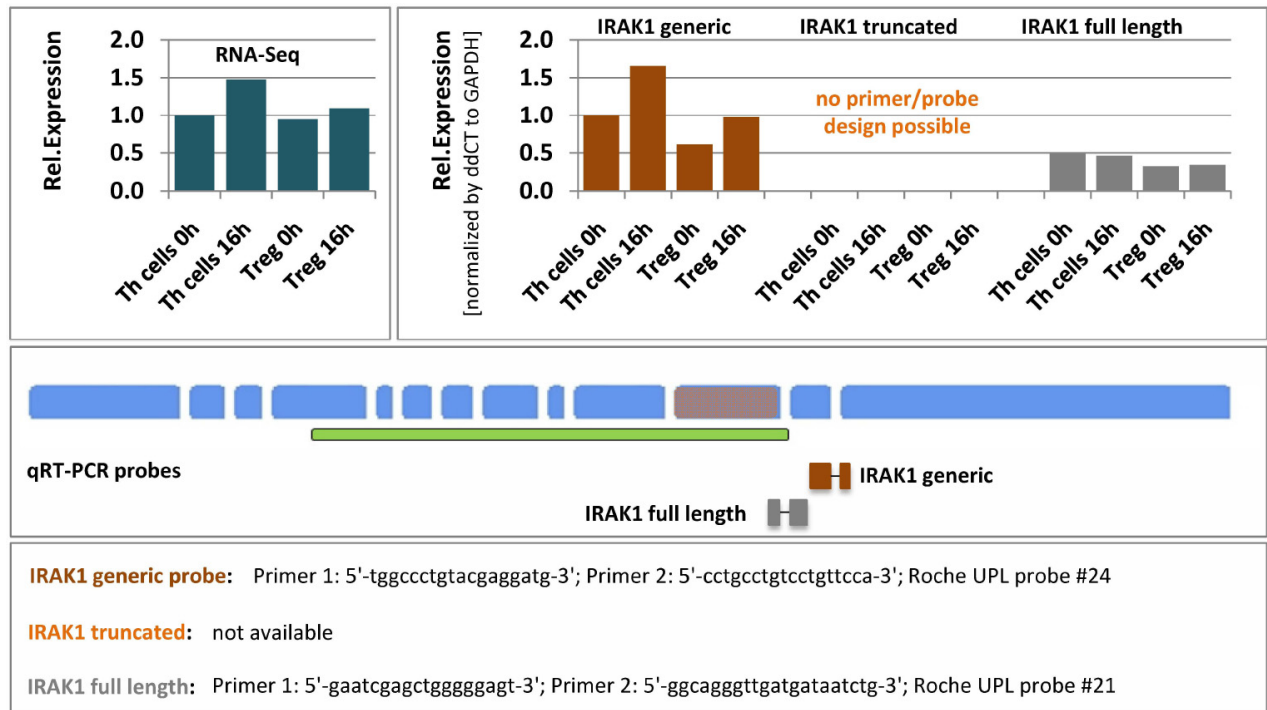

**Figure S2: The presence and regulation of the truncated form of AUF1 was proven** indirectly by qRT-PCR using Roche’s UPL technology. The presence of the truncated isoform AUF1 was confirmed. The truncated isoform is the major transcript, which is even higher expressed upon T cell stimulation. Used primer sequences and associated UPL probe are shown at the bottom.

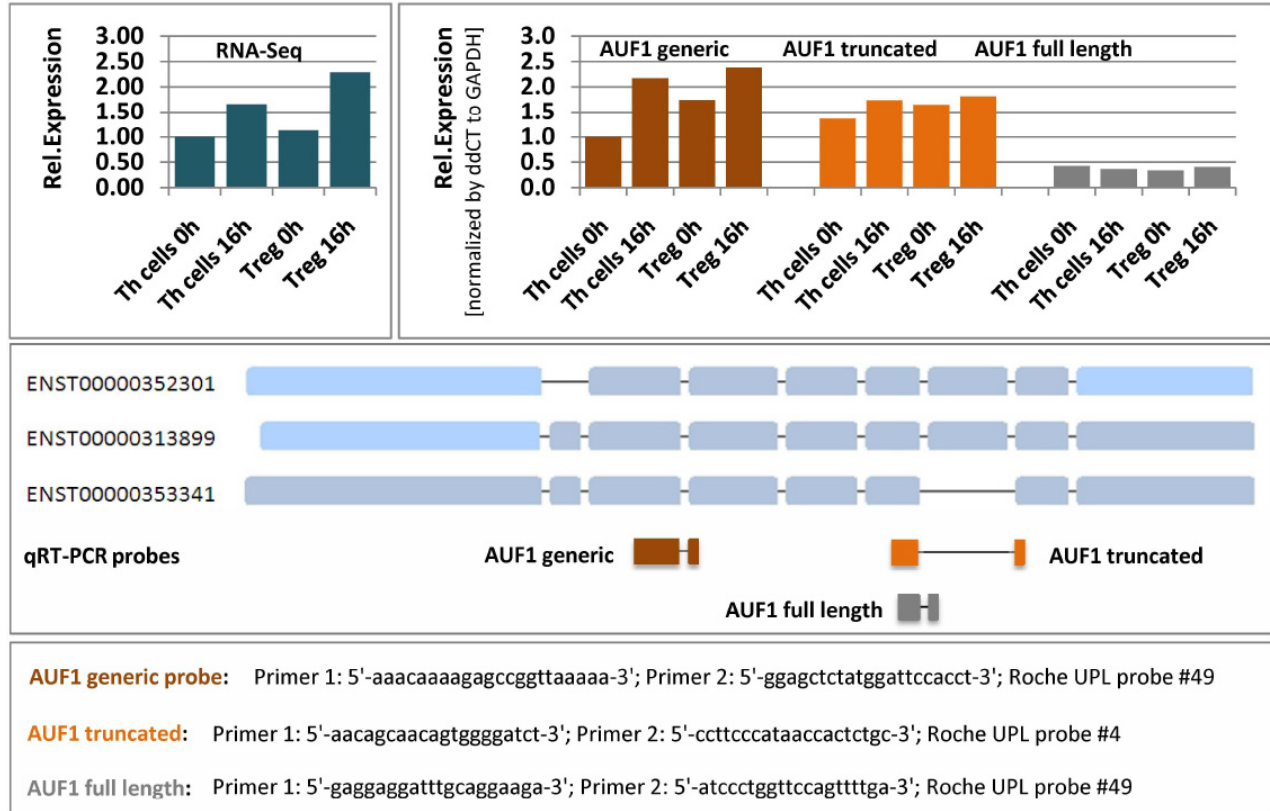

Supplement: supp_gkr444_Supplement_Figures.pdf [file supp_gkr444_Supplement_Figures.pdf]
